# Supplementary material
Source: MDPI journal article supplement (https://www.mdpi.com/1424-2818/13/7/323)
Supplement: s1 [file s1]

# Supplementary Materials:

**Figure S1:** Venn diagram for (a) Bacteria and (b) Archaea; **Figure S2:** Venn diagram showing the sharing level of bacterial (a) and archaeal (b) genera between BC and TF brine samples; **Figure S3:** Principal Component Analysis computed on the previous dataset including physicochemical data related to BC and TF brine samples; **Figure S4:** Circos diagrams showing the connection among brine samples and metabolic pathways. The ribbon size represents cell value correspondent to brine/metabolic pathway segment pair, while the stacked bars show ribbon contribution for each segment; **Table S1:** Microbiological and physico-chemical data previously reported for brines; **Table S2:** The total number of sequence reads, good quality reads, observed number of OTUs, Shannon diversity, Evenness and Chao 1 indices per sample of the bacterial and archaeal 16S rRNA gene data sets. Data are from Papale et al. [4] and Lo Giudice et al. [12]; **Table S3:** Relative abundance (% on the total predicted pathways) of predicted metabolic pathways identified in prokaryotic populations produced by the PICRUST analysis. The icons are referred to percentages within the same sub-group (in bold).

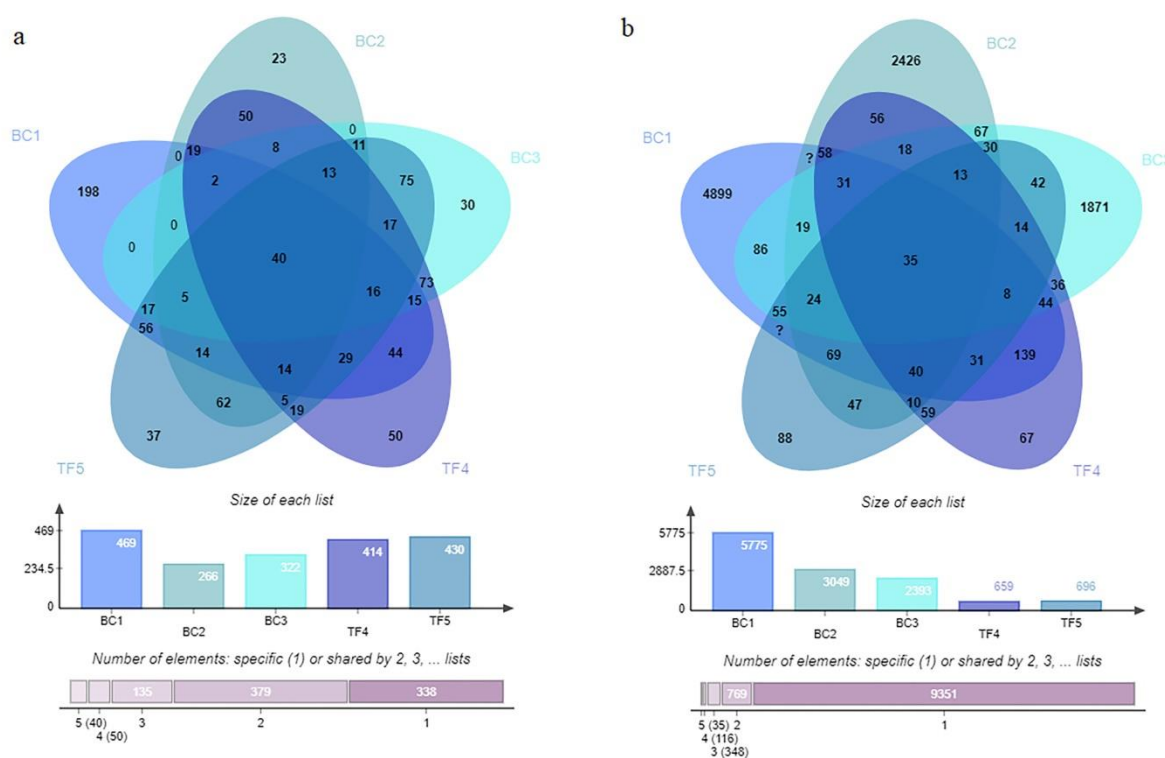

**Figure S1. (a-b).** Venn diagram for (a) Bacteria and (b) Archaea.

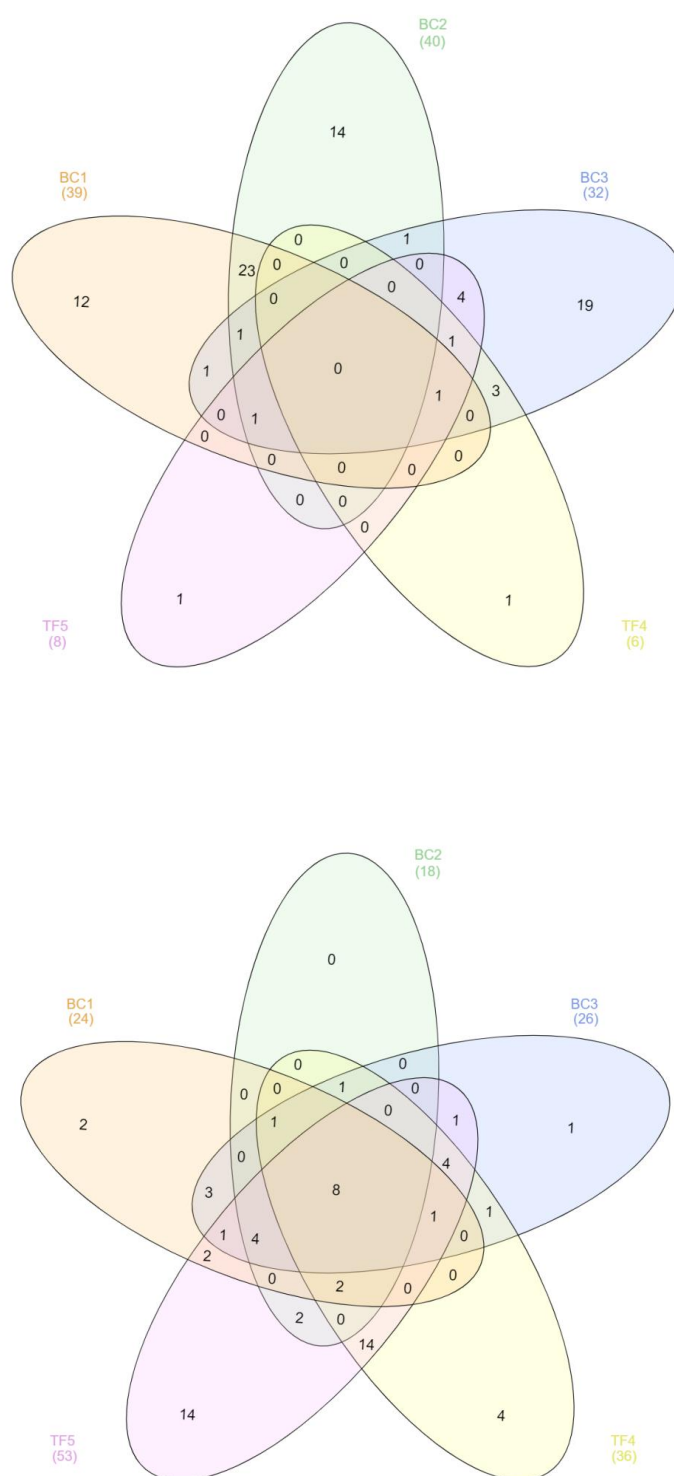

**Figure S2. (a-b):** Venn diagram showing the sharing level of bacterial (a) and archaeal (b) genera between BC and TF brine samples.

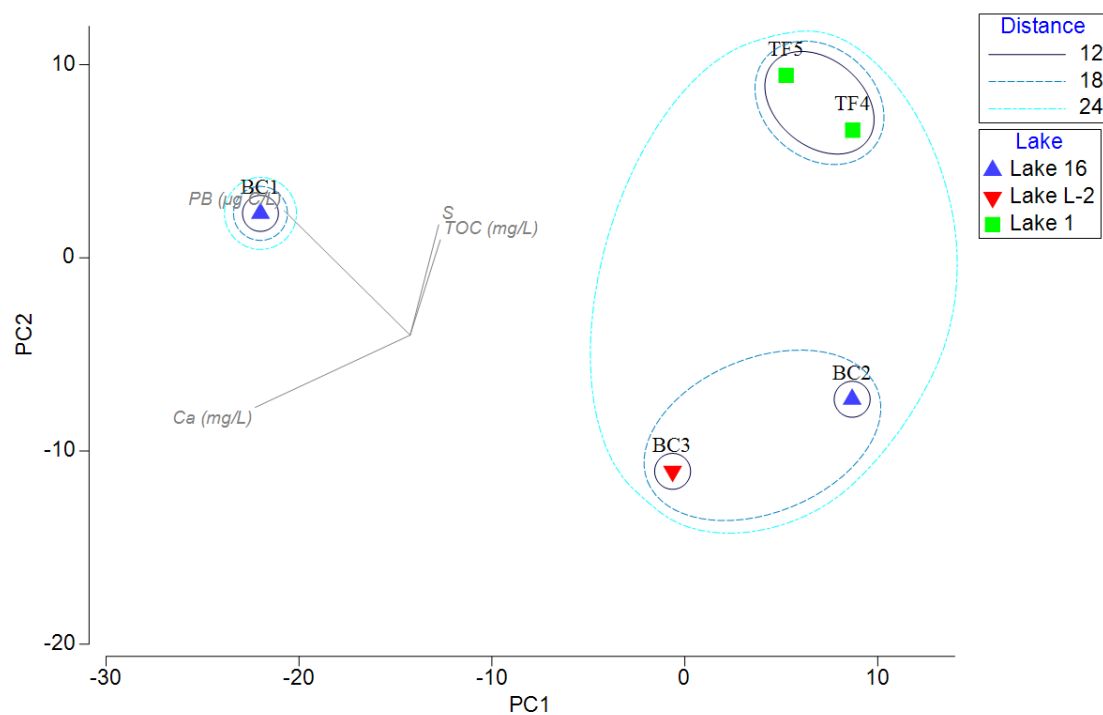

**Figure S3.** Principal Component Analysis computed on the previous dataset including physicochemical data related to BC and TF brine samples.

a)

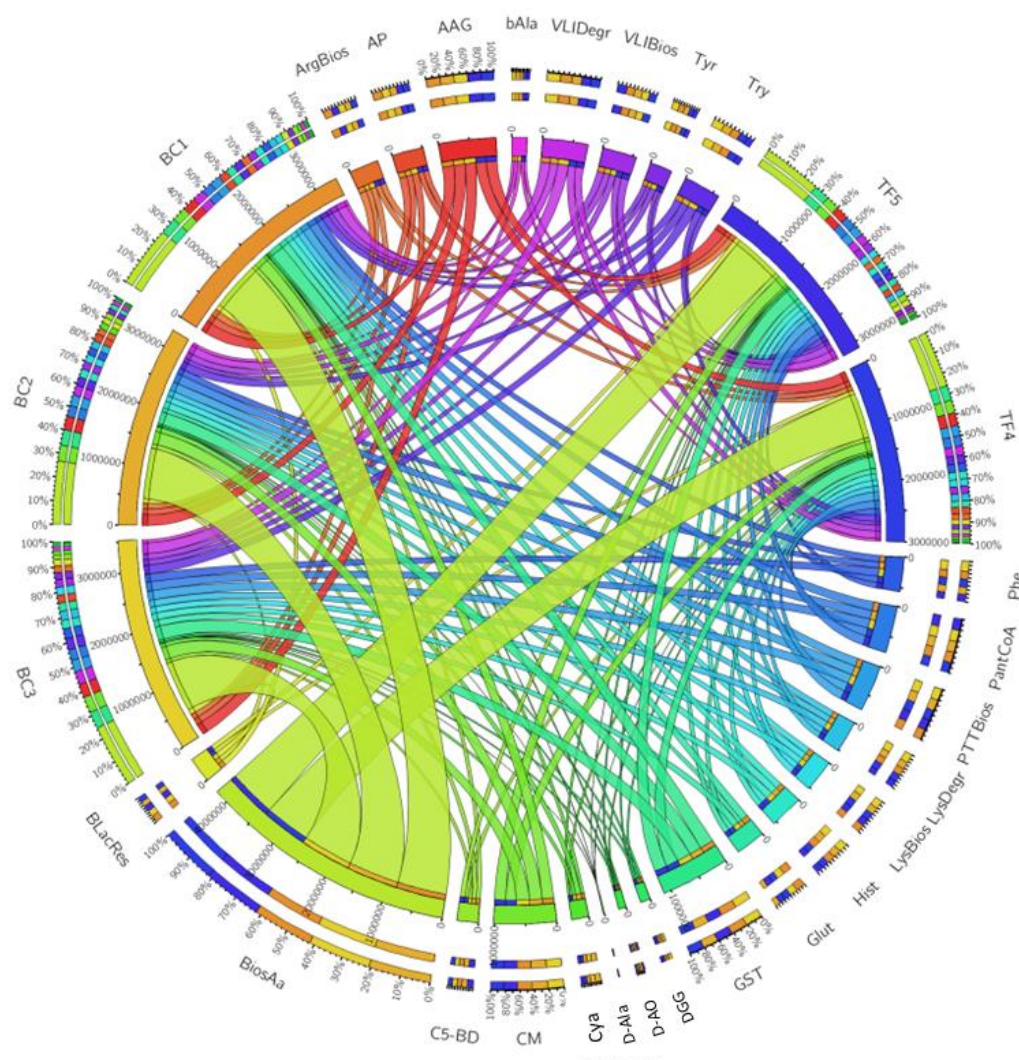

### Amino Acid Metabolism

|         |                                                |          |                                        |
|---------|------------------------------------------------|----------|----------------------------------------|
| AAG     | Alanine_aspartate_glutamate metabolism         | LysBios  | Lysine_biosynthesis                    |
| AP      | Arginine_Proline_metabolism                    | LysDegr  | Lysine_degradation                     |
| BiosAa  | Biosynthesis_aminoacids                        | Try      | Tryptophan_metabolism                  |
| Cya     | Cyanoamino_acid_metabolism                     | VLIBios  | Valine_leucine_isoleucine_biosynthesis |
| CM      | Cysteine_methionine_metabolism                 | VLI Degr | Valine_leucine_isoleucine_degradation  |
| D-Ala   | D-Alanine_metabolism                           | DGG      | D-Glutamine_D-glutamate_metabolism     |
| D-AO    | D-Arginine_D-ornithine_metabolism              | GST      | Glycine_serine_threonine_metabolism    |
| ArgBios | Arginine_biosynthesis                          | Hist     | Histidine_metabolism                   |
| bAla    | beta-Alanine_metabolism                        | Tyr      | Tyrosine_metabolism                    |
| BLacRes | beta-Lactam_resistance                         | C5-BD    | C5-Branched_dibasic_metabolism         |
| Phe     | Phenylalanine_metabolism                       | Glut     | Glutathione_metabolism                 |
| PTTBios | Phenylalanine_tyrosine_tryptophan_biosynthesis | PantCoA  | Pantothenate_CoA_biosynthesis          |



b)

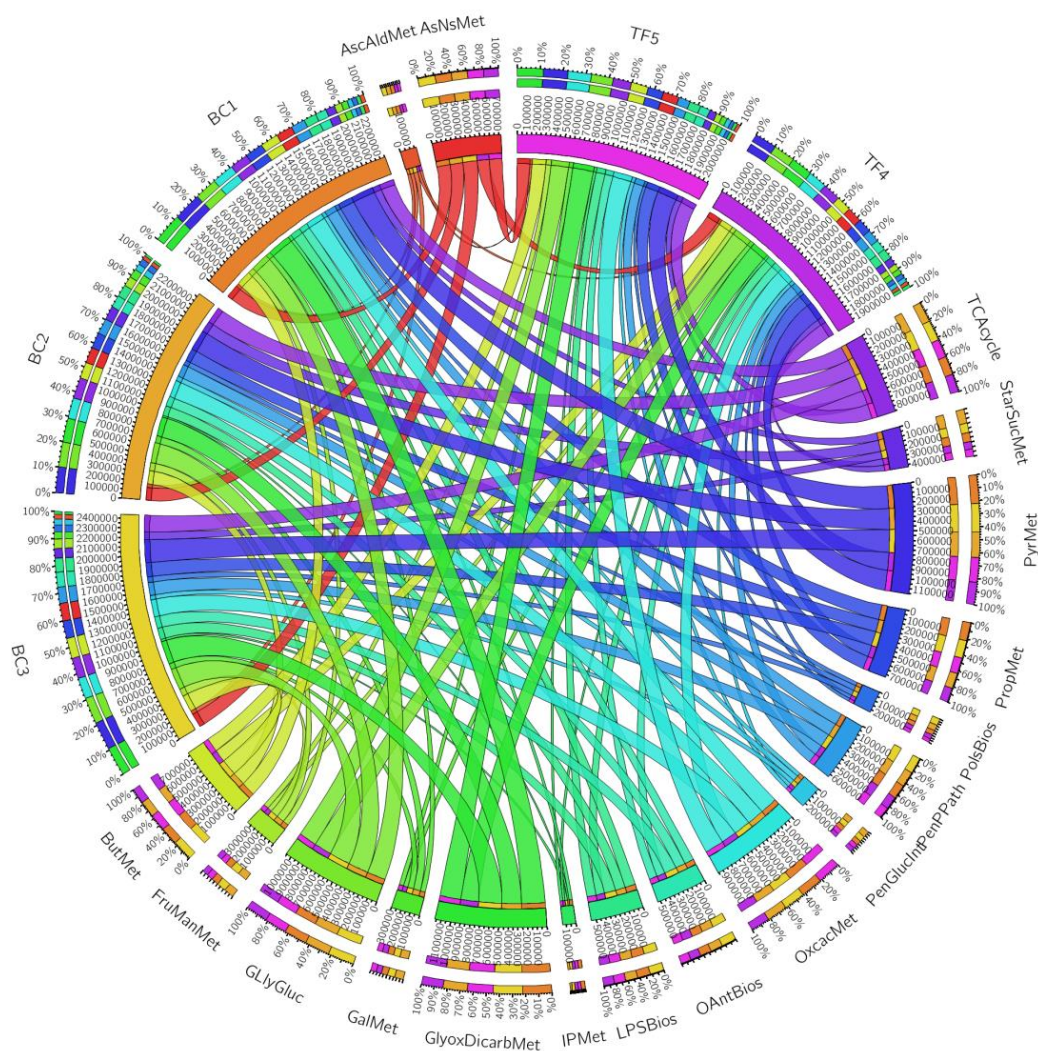

### Carbohydrate Metabolism

|                 |                                             |             |                                          |
|-----------------|---------------------------------------------|-------------|------------------------------------------|
| OxcacMet:       | 2-Oxocarboxylic acid metabolism             | PenGlucInt: | Pentose and glucuronate interconversions |
| AsNsMet:        | Amino sugar and nucleotide sugar metabolism | PenPPath:   | Pentose phosphate pathway                |
| ButMet:         | Butanoate metabolism                        | PolSBios:   | Polyketide sugar unit biosynthesis       |
| TCA cycle:      | Citrate cycle (TCA cycle)                   | PyrMet:     | Pyruvate metabolism                      |
| FruManMet:      | Fructose and mannose metabolism             | StarSucMet: | Starch and sucrose metabolism            |
| GalMet:         | Galactose metabolism                        | AscAldMet:  | Ascorbate and aldarate metabolism        |
| GLyGluc:        | Glycolysis / Gluconeogenesis                | PropMet:    | Propanoate metabolism                    |
| GlyoxDicarbMet: | Glyoxylate and dicarboxylate metabolism     | IPMet:      | Inositol phosphate metabolism            |
| LPSBios:        | Lipopolysaccharide biosynthesis             | OAntBios:   | O-Antigen nucleotide sugar biosynthesis  |

c)

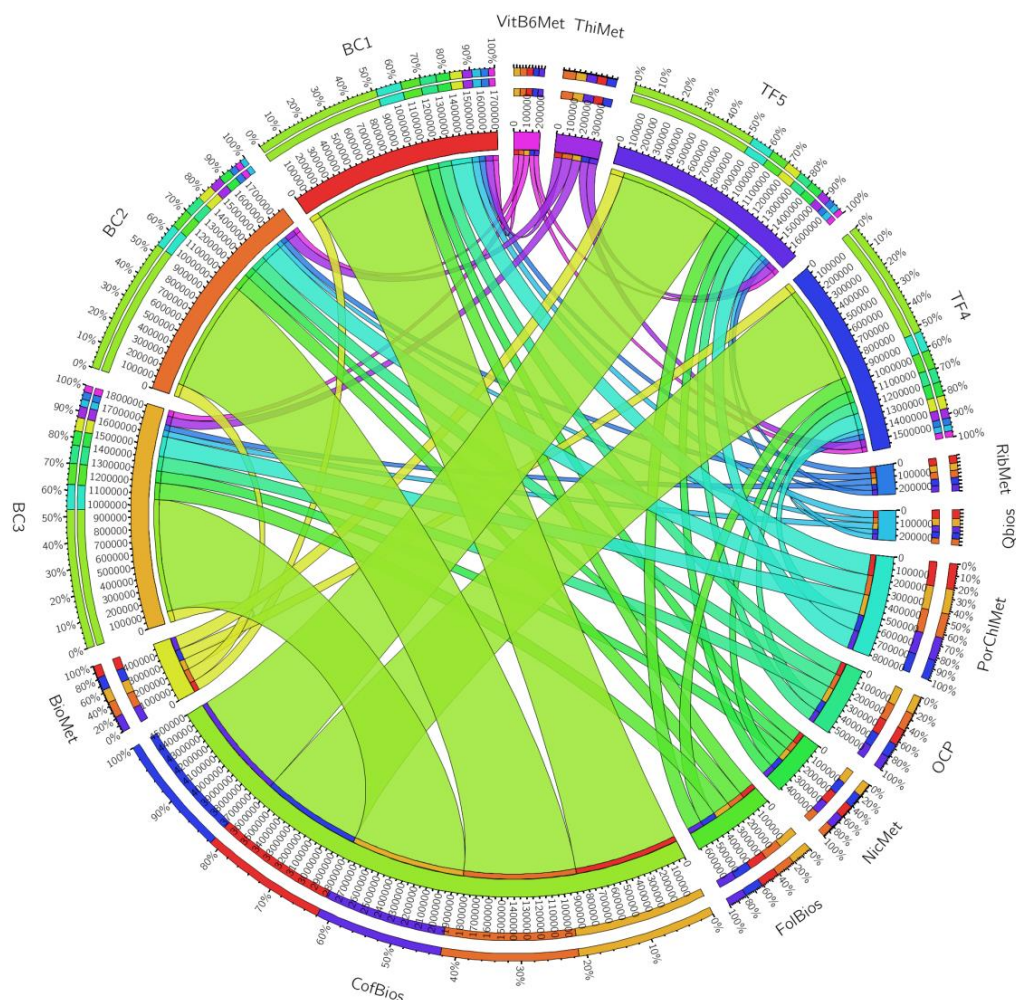

### Metabolism of cofactors and vitamins

|            |                                        |           |                                                     |
|------------|----------------------------------------|-----------|-----------------------------------------------------|
| FolBios:   | Folate biosynthesis                    | ThiMet:   | Thiamine metabolism                                 |
| NicMet:    | Nicotinate and nicotinamide metabolism | Qbios:    | Ubiquinone and other terpenoid-quinone biosynthesis |
| OCP:       | One carbon pool by folate              | VitB6Met: | Vitamin B6 metabolism                               |
| PorChlMet: | Porphyrin and chlorophyll metabolism   | BioMet:   | Biotin metabolism                                   |
| RibMet:    | Riboflavin metabolism                  | CofBios:  | Biosynthesis of cofactors                           |



d)

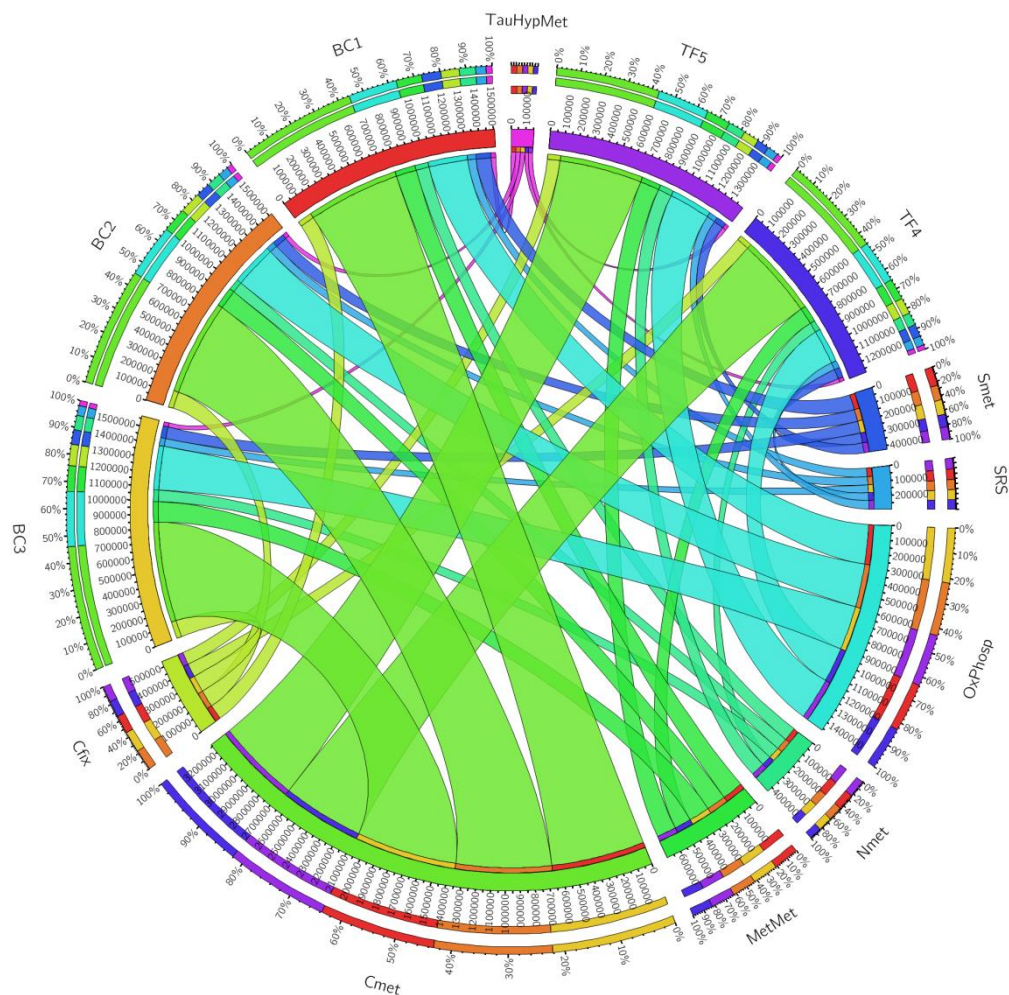

### Energy Metabolism

|         |                                             |            |                                    |
|---------|---------------------------------------------|------------|------------------------------------|
| Cfix:   | Carbon fixation in photosynthetic organisms | Smet:      | Sulfur metabolism                  |
| Cmet:   | Carbon metabolism                           | OxPhosp:   | Oxidative phosphorylation          |
| MetMet: | Methane metabolism                          | SRS:       | Sulfur relay system                |
| Nmet:   | Nitrogen metabolism                         | TauHypMet: | Taurine and hypotaurine metabolism |

e)

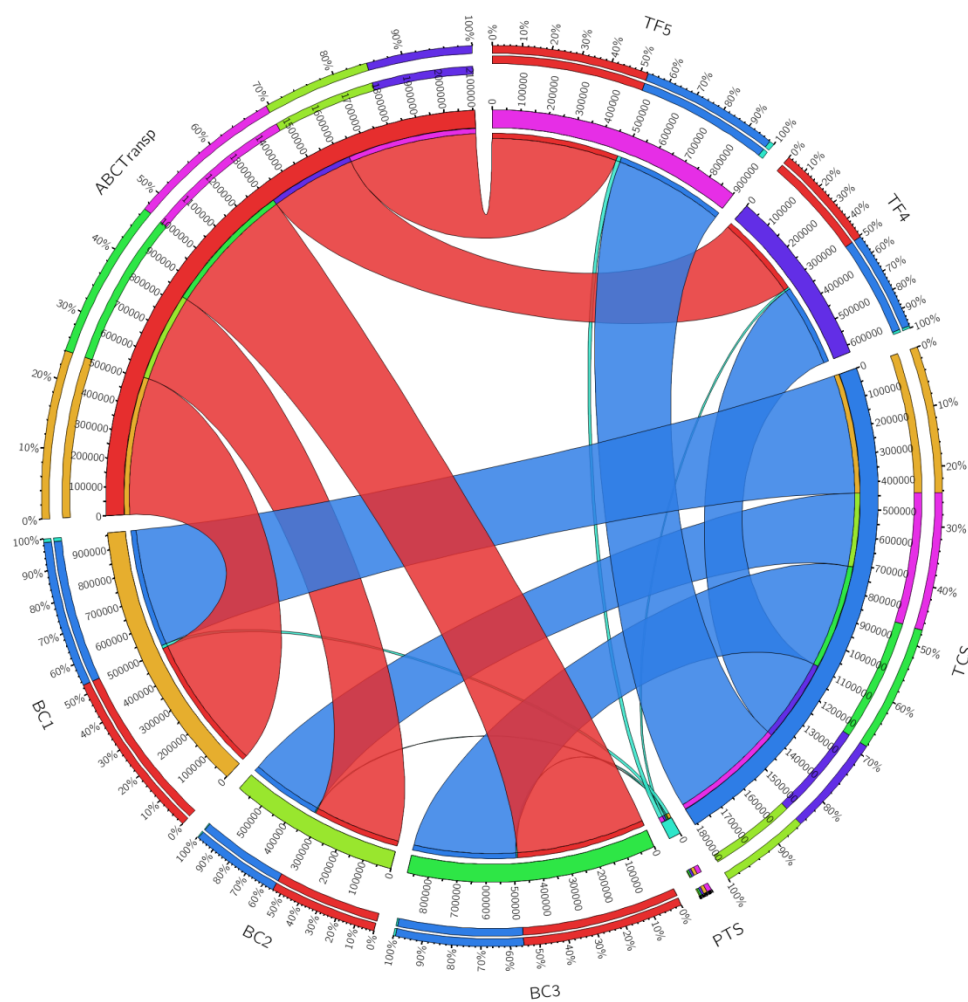

### Transporters

|           |                                 |
|-----------|---------------------------------|
| ABCTransp | ABC transporters                |
| PTS       | Phosphotransferase system (PTS) |
| TCS       | Two-component system            |



|             |                                                 |       |                                             |
|-------------|-------------------------------------------------|-------|---------------------------------------------|
| ArComp:     | Degradation of aromatic compounds               | Xyl:  | Xylene degradation                          |
| BA:         | Benzoate degradation                            | Tol:  | Toluene degradation                         |
| ABA:        | Aminobenzoate degradation                       | Ger:  | Geraniol degradation                        |
| ClAlk:      | Chloroalkane and chloroalkene degradation       | Naph: | Naphthalene degradation                     |
| RNA:        | RNA degradation                                 | Diox: | Dioxin degradation                          |
| ClCyclBenz: | Chlorocyclohexane and chlorobenzene degradation | Capr: | Caprolactam degradation                     |
| Sty:        | Styrene degradation                             | NT:   | Nitrotoluene degradation                    |
| FBA:        | Fluorobenzoate degradation                      | PAH:  | Polycyclic aromatic hydrocarbon degradation |
| LimPin:     | Limonene and pinene degradation                 | Gly:  | Other glycan degradation                    |

**Figure S4. (a-f):** Circos diagrams showing the connection among brine samples and metabolic pathways. The ribbon size represents cell value correspondent to brine/metabolic pathway segment pair, while the stacked bars show ribbon contribution for each segment.

**Table S1.** Microbiological and physico-chemical data previously reported for brines.

|                                                |                                       | TF4    | TF5    | BC1    | BC2     | BC3    |
|------------------------------------------------|---------------------------------------|--------|--------|--------|---------|--------|
| <i>Trace elements</i><br>(mg L <sup>-1</sup> ) | Al                                    | 17     | >5     | nd     | nd      | nd     |
|                                                | Ba                                    | 1.4    | 0.8    | nd     | nd      | nd     |
|                                                | Ca                                    | 0.8    | 0.8    | 362.9  | 2.7     | 148.1  |
|                                                | Cd                                    | 0.3    | 0.1    | 0.0    | 0.1     | 0.1    |
|                                                | Cl                                    | nd     | nd     | 3410.9 | 14.1    | 476.4  |
|                                                | Co                                    | 0.7    | 0.7    | 1.1    | 0.0     | 0.0    |
|                                                | Cr                                    | 0.4    | 0.2    | nd     | nd      | nd     |
|                                                | Cu                                    | 7.3    | >5     | nd     | nd      | nd     |
|                                                | Fe                                    | 29.7   | 5.7    | nd     | nd      | nd     |
|                                                | I                                     | 1.2    | 2      | nd     | nd      | nd     |
|                                                | K                                     | 0.5    | 0.9    | 70.7   | 0.3     | 18.7   |
|                                                | Li                                    | 1.17   | 1.77   | nd     | nd      | nd     |
|                                                | Mg                                    | 2.0    | 2.8    | 167.4  | 0.8     | 21.9   |
|                                                | Mn                                    | 1.58   | 2.05   | nd     | nd      | nd     |
|                                                | Na                                    | nd     | nd     | 2263.7 | 9.3     | 546.4  |
|                                                | Ni                                    | 1.7    | 1.8    | 5.3    | 0.2     | 0.1    |
|                                                | Sr                                    | 5.7    | 7.8    | nd     | nd      | nd     |
|                                                | Ti                                    | 263.0  | 118.0  | nd     | nd      | nd     |
|                                                | U                                     | 7.0    | 6.0    | nd     | nd      | nd     |
|                                                | V                                     | 1.4    | 2.9    | nd     | nd      | nd     |
|                                                | Zn                                    | 17.7   | > 5    | nd     | nd      | nd     |
| <i>Anions</i>                                  | NO <sub>3</sub> (mg L <sup>-1</sup> ) | >0.004 | >0.004 | nd     | nd      | nd     |
|                                                | PO <sub>4</sub> (g L <sup>-1</sup> )  | >0.002 | >0.002 | nd     | nd      | nd     |
|                                                | SO <sub>4</sub> (mg L <sup>-1</sup> ) | 10.6   | 10.9   | 1695.8 | 5.6     | 1043.8 |
| <i>Prokaryotic community</i>                   |                                       |        |        |        |         |        |
| <i>AC_Diversity Indices</i>                    | Shannon                               | 6045.0 | 6863.0 | 5.9    | 5.7     | 5.3    |
|                                                | Eveness                               | 0.4    | 0.2    | 0.7    | 0.7     | 0.7    |
|                                                | Chao I                                | 3738.0 | 3892.0 | 9559.2 | 10419.8 | 7762.2 |
| <i>BC_Diversity Indices</i>                    | Shannon                               | 4804.0 | 4971.0 | 2.7    | 2.2     | 2.3    |
|                                                | Eveness                               | 0.3    | 0.1    | 0.5    | 0.4     | 0.4    |
|                                                | Chao I                                | 1377.0 | 2148.0 | 1079.6 | 590.3   | 941.1  |
| <i>AC (%)</i>                                  | AAG                                   | 1.6    | 1.8    | 2.0    | 1.1     | 2.2    |
|                                                | CREN                                  | 7.8    | 7.8    | 15.3   | 12.4    | 14.0   |
|                                                | EURY                                  | 55.8   | 57.1   | 81.4   | 85.7    | 82.4   |
|                                                | KORAR                                 | 0.1    | 0.0    | 0.3    | 0.8     | 1.1    |
|                                                | MHV Group I                           | 0.2    | 0.1    | 1.0    | 0.0     | 0.3    |
| <i>BC (%)</i>                                  | UNC                                   | 34.6   | 33.1   | 0.0    | 0.0     | 0.0    |
|                                                | ACID                                  | <0.1   | <0.1   | <0.1   | <0.1    | <0.1   |
|                                                | ACT                                   | 17.2   | 13.7   | 2.7    | 5.8     | 4.0    |
|                                                | ALF                                   | 1.9    | 4.3    | 3.5    | 0.1     | <0.1   |

|                                    |                                               |      |      |      |      |      |
|------------------------------------|-----------------------------------------------|------|------|------|------|------|
|                                    | AQU                                           | 0.0  | <0.1 | 0.2  | 0.1  | 0.0  |
|                                    | BAC                                           | 79.7 | 69.0 | 28.6 | 9.4  | 52.7 |
|                                    | BET                                           | 2.9  | 4.6  | 14.3 | 4.5  | 17.7 |
|                                    | CHLAM                                         | <0.1 | <0.1 | <0.1 | <0.1 | <0.1 |
|                                    | Chlorobi                                      | <0.1 | <0.1 | <0.1 | <0.1 | <0.1 |
|                                    | Chloroflexi                                   | <0.1 | 0.1  | 0.4  | 0.0  | 0.0  |
|                                    | CYA                                           | 0.4  | 0.6  | 0.2  | 0.0  | <0.1 |
|                                    | DEF                                           | <0.1 | <0.1 | <0.1 | <0.1 | <0.1 |
|                                    | DEL                                           | 1.6  | 22.0 | 0.0  | 0.0  | 0.0  |
|                                    | EPS                                           | 1.4  | 5.4  | 0.8  | 0.0  | 0.0  |
|                                    | FIR                                           | 1.5  | 0.6  | 0.1  | <0.1 | 0.0  |
|                                    | GAM                                           | 33.4 | 29.6 | 3.9  | 0.2  | 0.4  |
|                                    | PAR                                           | 0.0  | 0.0  | 1.6  | <0.1 | 0.3  |
|                                    | PLAN                                          | 1.6  | 0.1  | 0.0  | 0.0  | 0.0  |
|                                    | PROT UNC                                      | 0.0  | 0.0  | 5.0  | 0.1  | 0.3  |
|                                    | SPIR                                          | 2.1  | 0.8  | 0.0  | 0.0  | 0.0  |
|                                    | OTHERS                                        | 7.3  | 8.6  | 14.9 | 9.6  | 8.2  |
| <i>Microbial Activities</i>        | AP (nmol L <sup>-1</sup> h <sup>-1</sup> )    | 1.1  | 1.0  | 3.9  | 0.6  | 1.1  |
|                                    | β-GLU (nmol L <sup>-1</sup> h <sup>-1</sup> ) | 2.5  | 0.1  | 0.1  | 1.2  | 1.6  |
|                                    | LAP (nmol L <sup>-1</sup> h <sup>-1</sup> )   | 2.0  | 2.0  | 2.0  | 1.3  | 0.5  |
| <i>Physiological Profiles (PP)</i> |                                               |      |      |      |      |      |
| <i>Complex carbon sources</i>      | Tween 40                                      | 6.8  | 2.0  | 11.4 | 3.9  | 3.1  |
|                                    | Tween 80                                      | 7.4  | 3.7  | 10.6 | 3.9  | 7.9  |
|                                    | α_cyclodextrin                                | 11.8 | 1.0  | 16.6 | 1.7  | 1.2  |
| <i>Carbohydrates</i>               | Glycogen                                      | 0.0  | 1.2  | 1.5  | 4.2  | 2.7  |
|                                    | D_cellobiose                                  | 3.4  | 3.2  | 15.0 | 3.2  | 1.6  |
|                                    | α_D_lactose                                   | 2.7  | 2.3  | 0.0  | 0.0  | 0.0  |
|                                    | β_methyl_D_glu coside                         | 0.6  | 4.0  | 0.0  | 0.0  | 0.0  |
|                                    | D_xylose                                      | 10.7 | 8.2  | 0.2  | 5.7  | 3.2  |
|                                    | i_erythritol                                  | 4.4  | 5.2  | 0.2  | 3.7  | 2.2  |
|                                    | D_mannitol                                    | 0.2  | 2.4  | 0.2  | 4.6  | 20.3 |
|                                    | N_acetyl_D_glu cosamine                       | 0.1  | 3.2  | 3.0  | 3.1  | 3.2  |
|                                    | Glucose_1_phos phste                          | 2.0  | 1.2  | 0.5  | 4.2  | 2.1  |
| <i>Phosphate-carbon</i>            | D,l_α_glycerol phosphate                      | 2.5  | 4.3  | 0.0  | 0.0  | 0.0  |
| <i>Carboxylic acid</i>             | Pyruvic acid methyl ester                     | 4.1  | 2.0  | 7.6  | 3.9  | 13.6 |
|                                    | D_glucosamic acid                             | 1.4  | 1.1  | 0.4  | 6.0  | 4.5  |
|                                    | D_galactonic acid                             | 1.0  | 4.8  | 0.5  | 5.2  | 2.0  |
|                                    | 2_hydroxy                                     | 3.3  | 1.5  | 0.0  | 3.5  | 3.7  |

|                          |                                               |       |       |       |      |      |
|--------------------------|-----------------------------------------------|-------|-------|-------|------|------|
| Amino acids              | benzoic acid                                  |       |       |       |      |      |
|                          | 4_hydroxy benzoic acid                        | 6.8   | 2.5   | 12.0  | 4.6  | 4.7  |
|                          | $\gamma$ _hydroxy butyric acid                | 2.4   | 2.5   | 0.3   | 4.1  | 1.2  |
|                          | Itaconic acid                                 | 5.3   | 8.2   | 0.3   | 5.2  | 3.1  |
|                          | $\alpha$ _ketobutyric acid                    | 2.5   | 3.4   | 0.3   | 3.0  | 3.1  |
|                          | D_malic Acid                                  | 2.3   | 6.9   | 0.0   | 0.0  | 0.0  |
|                          | L_arginine                                    | 1.9   | 1.6   | 0.0   | 0.0  | 0.0  |
|                          | L_asparagine                                  | 0.1   | 1.3   | 10.0  | 3.3  | 1.4  |
|                          | l_phenylalanine                               | 5.6   | 1.1   | 1.8   | 5.4  | 2.4  |
|                          | L_serine                                      | 0.4   | 1.2   | 0.3   | 5.4  | 1.8  |
|                          | L_threonine                                   | 0.8   | 1.2   | 0.0   | 2.7  | 2.5  |
|                          | Glycyl_L_glutamic acid                        | 1.2   | 1.4   | 7.1   | 3.2  | 2.3  |
|                          | Phenylethyl_amine                             | 0.0   | 1.0   | 0.1   | 5.5  | 4.4  |
|                          | Putrescine                                    | 7.8   | 4.5   | 0.0   | 0.6  | 1.7  |
| Microbial abundance      | BVC TSA1 (CFU mL <sup>-1</sup> )              | 3.1   | 7.2   | 15.5  | 0.0  | 0.0  |
|                          | BVC TSA50 (CFU mL <sup>-1</sup> )             | 4.7   | 5.5   | 4.3   | 0.5  | 0.9  |
|                          | BVC TSA100 (CFU mL <sup>-1</sup> )            | 3.3   | 5.5   | 5.3   | 0.1  | 2.3  |
|                          | BVC DSMZ97 (CFU mL <sup>-1</sup> )            | 0.0   | 0.0   | 0.0   | 0.0  | 0.1  |
|                          | BVC R2A (CFU mL <sup>-1</sup> )               | 0.1   | 0.1   | 0.0   | 0.0  | 0.0  |
|                          | CTC (%)                                       | 18.0  | 30.2  | 8.5   | 1.0  | 7.1  |
|                          | DEAD cells (%)                                | 33.0  | 59.2  | 55.5  | 94.7 | 90.5 |
|                          | LIVE cells (%)                                | 67.0  | 40.8  | 44.5  | 5.3  | 9.5  |
|                          | PA (cells L <sup>-1</sup> x 10 <sup>9</sup> ) | 5.0   | 8.1   | 6.1   | 0.4  | 0.4  |
|                          | PB ( $\mu$ g C L <sup>-1</sup> )              | 67.0  | 242.0 | 567.5 | 32.5 | 31.8 |
| Morphometric features    | Cocci (%)                                     | 44    | 28    | 31    | 23   | 0    |
|                          | Coccobacilli (%)                              | 26    | 33    | 0     | 50   | 26   |
|                          | Curved rods (%)                               | 0     | 5     | 4     | 0    | 0    |
|                          | Filamentous bacteria (%)                      | 0     | 0     | 27    | 0    | 0    |
|                          | Rods (%)                                      | 30    | 33    | 35    | 27   | 74   |
|                          | Vibrios (%)                                   | 0     | 0     | 2     | 0    | 0    |
|                          | VOL ( $\mu$ m <sup>3</sup> )                  | 0.04  | 0.1   | 0.2   | 0.2  | 0.1  |
| Environmental parameters | pH                                            | 7.2   | 6.7   | 6.5   | 7.9  | 7.0  |
|                          | S (psu)                                       | 90    | 75    | 6.3   | 0.04 | 1.6  |
|                          | TIC (mg L <sup>-1</sup> )                     | 628.3 | 674.8 | nd    | nd   | nd   |
|                          | TOC (mg L <sup>-1</sup> )                     | 82.0  | 102.5 | 11.5  | 6.6  | 6.4  |



**Table S2.** The total number of sequence reads, good quality reads, observed number of OTUs, Shannon diversity, Evenness and Chao 1 indices *per* sample of the bacterial and archaeal 16S rRNA gene data sets. Data are from Papale et al. [4] and Lo Giudice et al. [12].

|                 |        | Good quality reads     |       |         |                 | Diversity indices |           |          |           |
|-----------------|--------|------------------------|-------|---------|-----------------|-------------------|-----------|----------|-----------|
|                 | Sample | Total<br>reads<br>(n.) | n.    | %       | Chimeras<br>(%) | OTUs<br>(n.)      | Shannon H | Evenness | Chao 1    |
| <i>Bacteria</i> | TF4    | 31863                  | 18322 | 57.5024 | 2.9             | 414               | 4.804     | 0.347    | 1377.31   |
|                 | TF5    | 32823                  | 18394 | 56.0400 | 0               | 430               | 4.971     | 0.146    | 2148.849  |
| <i>Archaea</i>  | TF4    | 36555                  | 13425 | 36.7255 | 0               | 659               | 6.045     | 0.397    | 3738.437  |
|                 | TF5    | 29464                  | 11713 | 39.7536 | 0.1             | 696               | 6.863     | 0.185    | 3892.03   |
| <i>Bacteria</i> | BC1    | 37280                  | 11396 | 30.5687 | 0.1             | 469               | 2.753     | 0.469    | 1079.625  |
|                 | BC2    | 33932                  | 17780 | 52.3989 | 0               | 266               | 2.178     | 0.390    | 590.294   |
|                 | BC3    | 30005                  | 14961 | 49.8617 | 0               | 322               | 2.333     | 0.404    | 941.138   |
| <i>Archaea</i>  | BC1    | 40415                  | 14161 | 35.0390 | 3.1             | 5775              | 5.864     | 0.723    | 9559.173  |
|                 | BC2    | 36550                  | 13152 | 35.9836 | 8               | 3049              | 5.745     | 0.711    | 10419.855 |
|                 | BC3    | 29649                  | 10018 | 33.7887 | 7.2             | 2393              | 5.341     | 0.680    | 7762.220  |



**Table S3.** Relative abundance (% on the total predicted pathways) of predicted metabolic pathways identified in prokaryotic populations produced by the PICRUSt analysis. *The icons are referred to percentages within the same subgroup (in bold).*

| Total Pathways                                      | BC1   | BC2   | BC3   | TF4   | TF5   |
|-----------------------------------------------------|-------|-------|-------|-------|-------|
| Aminoacyl-tRNA biosynthesis                         | 0.89  | 0.93  | 0.95  | 1.04  | 0.98  |
| Bacterial chemotaxis                                | 0.52  | 0.20  | 0.30  | 0.48  | 0.77  |
| Bacterial secretion system                          | 0.86  | 0.59  | 0.66  | 0.76  | 0.92  |
| Base excision repair                                | 0.37  | 0.44  | 0.39  | 0.40  | 0.35  |
| Biosynthesis of secondary metabolites               | 9.07  | 9.64  | 9.16  | 9.48  | 8.99  |
| Biosynthesis of various secondary metabolites       | 0.08  | 0.12  | 0.11  | 0.10  | 0.10  |
| Cationic antimicrobial peptide (CAMP) resistance    | 0.36  | 0.33  | 0.33  | 0.28  | 0.33  |
| DNA replication                                     | 0.67  | 0.83  | 0.75  | 0.71  | 0.63  |
| Flagellar assembly                                  | 0.87  | 0.27  | 0.50  | 0.76  | 0.94  |
| Homologous recombination                            | 0.88  | 1.01  | 0.92  | 0.92  | 0.81  |
| Metabolic pathways                                  | 19.11 | 19.17 | 19.04 | 18.86 | 18.92 |
| Microbial metabolism in diverse environments        | 5.41  | 5.39  | 5.57  | 5.32  | 5.12  |
| Mismatch repair                                     | 0.69  | 0.82  | 0.75  | 0.74  | 0.67  |
| Non-homologous end-joining                          | 0.02  | 0.02  | 0.03  | 0.03  | 0.01  |
| Peptidoglycan biosynthesis                          | 0.68  | 0.74  | 0.71  | 0.77  | 0.70  |
| Phenazine biosynthesis                              | 0.07  | 0.09  | 0.08  | 0.09  | 0.08  |
| Phosphonate and phosphinate metabolism              | 0.01  | 0.01  | 0.00  | 0.00  | 0.01  |
| Plant-pathogen interaction                          | 0.21  | 0.15  | 0.18  | 0.20  | 0.23  |
| Protein export                                      | 0.55  | 0.60  | 0.57  | 0.64  | 0.63  |
| Quorum sensing                                      | 1.60  | 1.19  | 1.53  | 1.32  | 1.99  |
| Ribosome                                            | 1.92  | 2.30  | 2.15  | 2.34  | 2.07  |
| RNA polymerase                                      | 0.14  | 0.14  | 0.14  | 0.16  | 0.15  |
| Selenocompound metabolism                           | 0.32  | 0.38  | 0.36  | 0.35  | 0.32  |
| Sesquiterpenoid and triterpenoid biosynthesis       | 0.00  | 0.00  | 0.00  | 0.02  | 0.00  |
| Vancomycin resistance                               | 0.23  | 0.27  | 0.26  | 0.25  | 0.23  |
| <b>Amino acid metabolism</b>                        |       |       |       |       |       |
| Alanine, aspartate and glutamate metabolism         | 0.89  | 0.91  | 0.82  | 0.94  | 0.92  |
| Arginine and proline metabolism                     | 0.59  | 0.48  | 0.49  | 0.47  | 0.44  |
| Biosynthesis of amino acids                         | 3.91  | 4.16  | 3.81  | 4.11  | 4.06  |
| Cyanoamino acid metabolism                          | 0.25  | 0.40  | 0.26  | 0.22  | 0.17  |
| Cysteine and methionine metabolism                  | 0.92  | 1.05  | 0.98  | 0.94  | 0.93  |
| D-Alanine metabolism                                | 0.11  | 0.11  | 0.12  | 0.11  | 0.13  |
| D-Arginine and D-ornithine metabolism               | 0.01  | 0.00  | 0.01  | 0.01  | 0.02  |
| Arginine biosynthesis                               | 0.54  | 0.41  | 0.41  | 0.44  | 0.48  |
| beta-Alanine metabolism                             | 0.24  | 0.26  | 0.26  | 0.24  | 0.21  |
| beta-Lactam resistance                              | 0.44  | 0.37  | 0.38  | 0.35  | 0.40  |
| Phenylalanine metabolism                            | 0.51  | 0.50  | 0.61  | 0.57  | 0.46  |
| Phenylalanine, tyrosine and tryptophan biosynthesis | 0.67  | 0.72  | 0.70  | 0.77  | 0.71  |
| Lysine biosynthesis                                 | 0.47  | 0.50  | 0.49  | 0.54  | 0.50  |
| Lysine degradation                                  | 0.47  | 0.49  | 0.53  | 0.53  | 0.43  |
| Tryptophan metabolism                               | 0.57  | 0.61  | 0.67  | 0.60  | 0.45  |
| Valine, leucine and isoleucine biosynthesis         | 0.52  | 0.52  | 0.45  | 0.54  | 0.64  |
| Valine, leucine and isoleucine degradation          | 0.75  | 0.64  | 0.80  | 0.68  | 0.64  |
| D-Glutamine and D-glutamate metabolism              | 0.16  | 0.15  | 0.16  | 0.17  | 0.15  |
| Glycine, serine and threonine metabolism            | 1.08  | 1.02  | 1.03  | 1.09  | 1.06  |
| Histidine metabolism                                | 0.52  | 0.55  | 0.53  | 0.55  | 0.47  |
| Tyrosine metabolism                                 | 0.36  | 0.34  | 0.41  | 0.34  | 0.29  |
| C5-Branched dibasic acid metabolism                 | 0.32  | 0.35  | 0.27  | 0.32  | 0.40  |
| Glutathione metabolism                              | 0.58  | 0.33  | 0.49  | 0.47  | 0.44  |
| Pantothenate and CoA biosynthesis                   | 0.68  | 0.73  | 0.68  | 0.74  | 0.79  |

**Table S3.** Continues.

| Energy Metabolism                                   |  |      |  |      |  |      |  |      |  |      |
|-----------------------------------------------------|--|------|--|------|--|------|--|------|--|------|
| Carbon fixation in photosynthetic organisms         |  | 0.49 |  | 0.58 |  | 0.53 |  | 0.49 |  | 0.44 |
| Carbon metabolism                                   |  | 3.08 |  | 3.25 |  | 3.14 |  | 3.06 |  | 2.93 |
| Methane metabolism                                  |  | 0.69 |  | 0.67 |  | 0.64 |  | 0.64 |  | 0.68 |
| Nitrogen metabolism                                 |  | 0.44 |  | 0.40 |  | 0.36 |  | 0.38 |  | 0.50 |
| Sulfur metabolism                                   |  | 0.50 |  | 0.41 |  | 0.37 |  | 0.38 |  | 0.35 |
| Oxidative phosphorylation                           |  | 1.30 |  | 1.46 |  | 1.38 |  | 1.31 |  | 1.47 |
| Sulfur relay system                                 |  | 0.28 |  | 0.28 |  | 0.25 |  | 0.29 |  | 0.31 |
| Taurine and hypotaurine metabolism                  |  | 0.16 |  | 0.16 |  | 0.13 |  | 0.14 |  | 0.15 |
| Metabolism of cofactors and vitamins                |  |      |  |      |  |      |  |      |  |      |
| Folate biosynthesis                                 |  | 0.60 |  | 0.63 |  | 0.63 |  | 0.68 |  | 0.63 |
| Nicotinate and nicotinamide metabolism              |  | 0.44 |  | 0.40 |  | 0.43 |  | 0.50 |  | 0.46 |
| One carbon pool by folate                           |  | 0.52 |  | 0.59 |  | 0.55 |  | 0.52 |  | 0.48 |
| Porphyrin and chlorophyll metabolism                |  | 0.81 |  | 0.80 |  | 0.75 |  | 0.73 |  | 0.78 |
| Riboflavin metabolism                               |  | 0.24 |  | 0.23 |  | 0.21 |  | 0.25 |  | 0.22 |
| Thiamine metabolism                                 |  | 0.31 |  | 0.41 |  | 0.33 |  | 0.35 |  | 0.36 |
| Ubiquinone and other terpenoid-quinone biosynthesis |  | 0.28 |  | 0.19 |  | 0.23 |  | 0.22 |  | 0.22 |
| Vitamin B6 metabolism                               |  | 0.20 |  | 0.21 |  | 0.21 |  | 0.21 |  | 0.19 |
| Biotin metabolism                                   |  | 0.39 |  | 0.52 |  | 0.40 |  | 0.48 |  | 0.55 |
| Biosynthesis of cofactors                           |  | 4.04 |  | 4.49 |  | 4.16 |  | 4.38 |  | 4.30 |
| Metabolism of terpenoids and polyketides            |  |      |  |      |  |      |  |      |  |      |
| Carotenoid biosynthesis                             |  | 0.01 |  | 0.00 |  | 0.01 |  | 0.01 |  | 0.01 |
| Terpenoid backbone biosynthesis                     |  | 0.39 |  | 0.25 |  | 0.39 |  | 0.41 |  | 0.43 |
| Nonribosomal peptide structures                     |  | 0.02 |  | 0.04 |  | 0.02 |  | 0.01 |  | 0.03 |
| Transporters                                        |  |      |  |      |  |      |  |      |  |      |
| ABC transporters                                    |  | 2.33 |  | 1.54 |  | 2.10 |  | 1.66 |  | 2.31 |
| Phosphotransferase system (PTS)                     |  | 0.05 |  | 0.01 |  | 0.02 |  | 0.04 |  | 0.07 |
| Two-component system                                |  | 2.03 |  | 1.28 |  | 1.67 |  | 1.58 |  | 2.02 |
| Antibiotics                                         |  |      |  |      |  |      |  |      |  |      |
| Acarbose and validamycin biosynthesis               |  | 0.11 |  | 0.16 |  | 0.15 |  | 0.12 |  | 0.09 |
| Carbapenem biosynthesis                             |  | 0.08 |  | 0.07 |  | 0.06 |  | 0.07 |  | 0.08 |
| Monobactam biosynthesis                             |  | 0.26 |  | 0.29 |  | 0.27 |  | 0.30 |  | 0.27 |
| Novobiocin biosynthesis                             |  | 0.10 |  | 0.10 |  | 0.11 |  | 0.10 |  | 0.09 |
| Staurosporine biosynthesis                          |  | 0.01 |  | 0.00 |  | 0.00 |  | 0.00 |  | 0.00 |
| Streptomycin biosynthesis                           |  | 0.29 |  | 0.30 |  | 0.35 |  | 0.32 |  | 0.25 |
